# Supplementary material for: Dysregulation of Inflammatory Pathways in Adult Spinal Deformity Patients with Frailty
Source: MDPI journal article supplement (doi:10.3390/jcm13082294), 2024-04-16
Supplement: s1 [file s1]

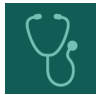

**Supplementary Table S1.** Comparison of baseline biomarkers between ASD patients who developed severe adverse events during follow-up and those who did not in the entire population.

| Biomarkers                | SAE−        | SAE+        | <i>p</i> Value |
|---------------------------|-------------|-------------|----------------|
| WBC (10 <sup>3</sup> /uL) | 5.1 ± 1.7   | 4.9 ± 1.7   | 0.56           |
| Hb (g/dL)                 | 12.4 ± 1.2  | 12.3 ± 1.3  | 0.84           |
| PLT (10 <sup>3</sup> /uL) | 24.1 ± 7.1  | 24.2 ± 9.6  | 0.94           |
| TLC (10 <sup>2</sup> /uL) | 30.3 ± 9.0  | 30.9 ± 8.2  | 0.79           |
| TP (g/dL)                 | 6.7 ± 0.5   | 6.7 ± 0.6   | 0.90           |
| ALB (g/dL)                | 4.0 ± 0.3   | 3.9 ± 0.5   | 0.22           |
| BUN (mg/dL)               | 15.1 ± 4.2  | 16.4 ± 4.7  | 0.11           |
| Cr (mg/dL)                | 0.67 ± 0.1  | 0.78 ± 0.23 | 0.01 *         |
| CRP (mg/dL)               | 0.23 ± 1.25 | 0.06 ± 0.07 | 0.44           |
| AST(IU/L)                 | 22.3 ± 11.3 | 22.6 ± 4.6  | 0.85           |
| ALT(IU/L)                 | 16.2 ± 7.1  | 16.7 ± 6.0  | 0.66           |
| PT-INR (%)                | 1.0 ± 0.1   | 0.9 ± 0.0   | 0.54           |
| aPTT (sec.)               | 28.3 ± 3.4  | 27.0 ± 3.1  | 0.13           |

Means and standard deviations; \* indicates statistically significant. TLC: Total lymphocyte count.
